# Supplementary material for: Diverting the phase transition behaviour of adipic acid via mesoporous silica confinement
Source: Royal Society of Chemistry journal article supplement (doi:10.1039/c6ra23498d), 2016-01-01
Supplement: c6ra23498d1.pdf [file c6ra23498d1.pdf]

## Electronic Supplementary Information

### Diverting phase transition behaviour of adipic acid via mesoporous silica confinement

Shang Liu,<sup>a, b</sup> Guixiang Ma,<sup>a, b</sup> Shaolei Xie,<sup>a</sup> Yongzhong Jia,<sup>a</sup> Jinhe Sun,<sup>\*a</sup> and Yan Jing<sup>\*a</sup>

<sup>a</sup> Key Lab of Comprehensive and Highly Efficient Utilization of Salt Lake Resources, Qinghai Institute of Salt Lakes, Chinese Academy of Sciences, Xining, Qinghai, 810008, P.R. China. E-mail: JinheSun2016@163.com; yanjing201633@yahoo.com.

<sup>b</sup> University of Chinese Academy of Sciences, Beijing 100049, P.R China.

**Table S1** FT-IR spectra results of adipic acid and composite material (take 2MCM-41 as representative sample).

| 2MCM-41                          |                                                   | Adipic acid                      |                                             | MCM-41                           |                               |
|----------------------------------|---------------------------------------------------|----------------------------------|---------------------------------------------|----------------------------------|-------------------------------|
| Wave numbers (cm <sup>-1</sup> ) | Type of vibrations                                | Wave numbers (cm <sup>-1</sup> ) | Type of vibrations                          | Wave numbers (cm <sup>-1</sup> ) | Type of vibrations            |
| 3439                             | -OH stretching                                    | 3419                             | -OH stretching                              | 3441                             | -OH stretching                |
| 2962                             | Associated -OH stretching                         | 2962                             | Associated -OH stretching                   |                                  |                               |
| 1694                             | -C=O stretching                                   | 1694                             | -C=O stretching                             |                                  |                               |
| 1463                             | C-C asymmetric bending                            | 1462                             | C-C asymmetric bending                      |                                  |                               |
| 1428                             | -OH in-plane deformation and C-O stretching       | 1428                             | -OH in-plane deformation and C-O stretching |                                  |                               |
| 1408                             | -CH <sub>2</sub> bending                          | 1408                             | -CH <sub>2</sub> bending                    |                                  |                               |
| 1280                             | -OH in-plane deformation and C-O stretching       | 1280                             | -OH in-plane deformation and C-O stretching |                                  |                               |
| 1238                             | bending vibration of -OH in isolated adipic acid  |                                  |                                             |                                  |                               |
| 1082                             | Asymmetric Si-O-Si stretching                     |                                  |                                             | 1082                             | Asymmetric Si-O-Si stretching |
| 929-960                          | Si-OH stretching and -OH out-of-plane deformation | 928                              | -OH out-of-plane deformation                | 962                              | Si-OH stretching              |
| 802                              | Si-O-Si symmetric stretching                      |                                  |                                             | 801                              | Si-O-Si symmetric stretching  |
| 736                              | -CH <sub>2</sub> in-plane deformation             | 736                              | -CH <sub>2</sub> in-plane deformation       |                                  |                               |
| 459                              | Si-O-Si bending                                   |                                  |                                             | 461                              | Si-O-Si bending               |

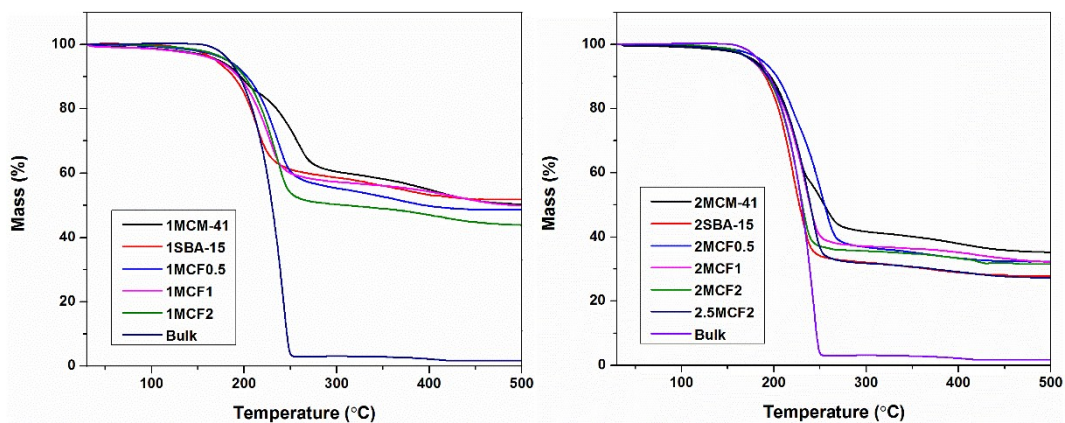

**Fig.S1** TG curves of composite materials and adipic acid in bulk state.

**Table S2** Remaining mass fraction of composite materials in TG curves.

| Samples | Remaining mass fraction (%) | Theoretical mass fraction (%) |
|---------|-----------------------------|-------------------------------|
| 1MCM-41 | 50.2                        | 50                            |
| 2MCM-41 | 35.1                        | 33.3                          |
| 1SBA-15 | 51.7                        | 50                            |
| 2SBA-15 | 27.9                        | 33.3                          |
| 1MCF0.5 | 48.6                        | 50                            |
| 2MCF0.5 | 32.4                        | 33.3                          |
| 1MCF1   | 49.1                        | 50                            |
| 2MCF1   | 32.2                        | 33.3                          |
| 1MCF2   | 43.5                        | 50                            |
| 2MCF2   | 31.6                        | 33.3                          |
| 2.5MCF2 | 27.3                        | 28.6                          |

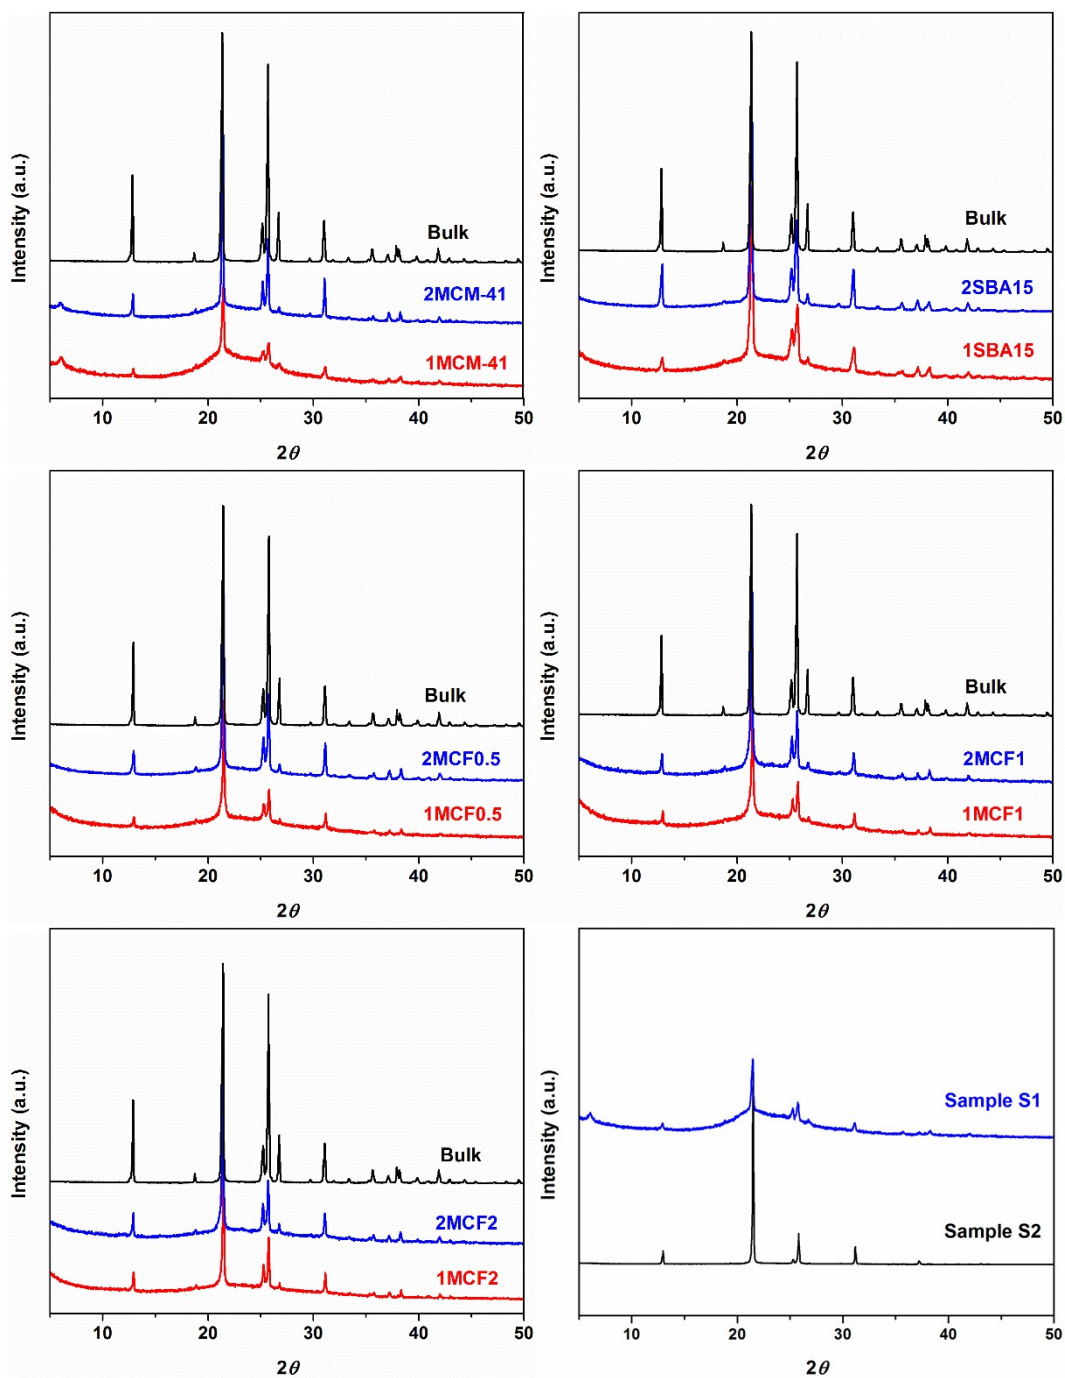

**Fig. S2** Wide angle X- ray powder diffraction patterns of composite materials and adipic acid in bulk state.

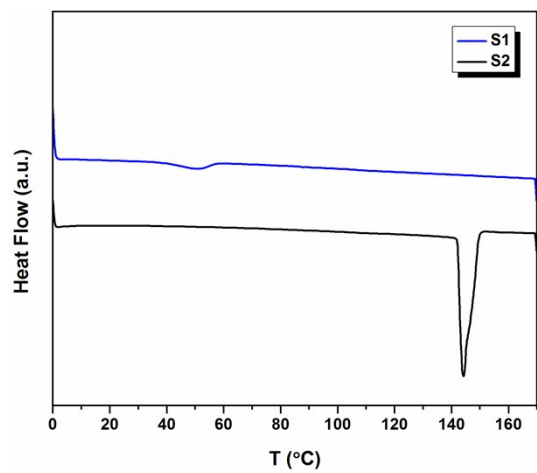

**Fig. S3** DSC profiles of reference samples (S1 and S2).
